# Supplementary material for: Tough on criminal wealth? Exploring the link between organized crime’s asset confiscation and regional entrepreneurship
Source: Springer Nature journal article supplement (doi:10.1007/s11187-018-0003-y), 2018-03-09
Supplement: MOESM1 [file 15524114]

**Tough on criminal wealth? Exploring the link between organized crime's asset confiscation and regional entrepreneurship\***

**Small Business Economics**

Elisa Operti  
 ESSEC Business School Paris  
 3 Av. B. Hirsch  
 95021 Cergy Pontoise  
[operti@essec.edu](mailto:operti@essec.edu)  
 Phone: +33134433736  
 ORCID id: 0000-0002-4788-5534

**Table A1.** Examples of legislation included in the measure of Local Institutional Responsiveness

| <b>Region</b>         | <b>Relevant legislation with dispositions regarding the management of confiscated assets</b> | <b>Representative Initiatives</b>                                                                                                                                                                                     |
|-----------------------|----------------------------------------------------------------------------------------------|-----------------------------------------------------------------------------------------------------------------------------------------------------------------------------------------------------------------------|
| Abruzzo               |                                                                                              |                                                                                                                                                                                                                       |
| Basilicata            | LR n. 7/2011                                                                                 | Reduction of credit uncertainty                                                                                                                                                                                       |
| Calabria              | LR n. 5/2007, LR n. 28/2010                                                                  | Assignment of confiscated assets to public institutions for initiatives that restore the rule of law; funding of sport and recreational activities on confiscated real estate                                         |
| Campania              | LR n. 7/2012                                                                                 | Creation of a Foundation coordinating initiatives and restoring governance; reduction of credit uncertainty following confiscation; public funding of entrepreneurial and social initiatives using confiscated assets |
| Emilia-Romagna        | LR n. 3/2011                                                                                 | Technical assistance and financing of real estate redeployment projects                                                                                                                                               |
| Friuli-Venezia Giulia |                                                                                              |                                                                                                                                                                                                                       |
| Lazio                 | LR n.15/2001; LR n.24/2009; delibera 575/2011                                                | Dedicated funding for the redeployment of confiscated real estate to governmental uses; an Observatory for monitoring confiscated assets; reduction of credit uncertainty following confiscation                      |
| Liguria               | LR n.7/2012; LR n.21/2013                                                                    | Public funding of entrepreneurial and social initiatives using confiscated assets in the agri-food sector                                                                                                             |
| Lombardia             | LR n. 9/2011                                                                                 | Public funding of initiatives aimed at asset redeployment; well-defined real estate assignment procedures                                                                                                             |
| Marche                |                                                                                              |                                                                                                                                                                                                                       |

\*We thank the Associate Editor Magnus Henrekson and two anonymous reviewers for their feedback on the first draft of this paper. The paper has also benefited from insightful comments from Himanshu Bhatt, Sen Chai, Gary Dushnitsky, and Wesley Sine, as well as during presentations at the 2017 INSEAD Doriot Entrepreneurship Conference, at the 2017 Academy of Management meeting, at HEC Paris, and at ESSEC Business School.

|                                 |                                           |                                                                                                                                                                                                                                                                                                                            |
|---------------------------------|-------------------------------------------|----------------------------------------------------------------------------------------------------------------------------------------------------------------------------------------------------------------------------------------------------------------------------------------------------------------------------|
| Molise                          |                                           |                                                                                                                                                                                                                                                                                                                            |
| Piemonte                        | LR n. 14/2007                             | Public funding of initiatives aimed at real estate redeployment                                                                                                                                                                                                                                                            |
| Puglia                          | Delibera 1693/2005;<br>Delibera 2328/2013 | Public funding of initiatives aimed at real estate redeployment with social goals                                                                                                                                                                                                                                          |
| Sardegna                        |                                           |                                                                                                                                                                                                                                                                                                                            |
| Sicilia                         | LR n.15/2008; LR n.<br>11/2011            | Public funding of initiatives aimed at real estate redeployment; reduction of credit uncertainty for entrepreneurs through public sponsorship; simplified allocation procedures; tax benefits for enterprises operating on confiscated assets; best practices concerning symbolic reuse (police stations, police vehicles) |
| Toscana                         |                                           |                                                                                                                                                                                                                                                                                                                            |
| Trentino-Alto<br>Adige/Südtirol | LR n. 15/2011                             | Financing of initiatives aimed at asset redeployment                                                                                                                                                                                                                                                                       |
| Umbria                          |                                           |                                                                                                                                                                                                                                                                                                                            |
| Valle d'Aosta/Vallée<br>d'Aoste | LR n.11/2010                              | Financing of initiatives aimed at real estate redeployment                                                                                                                                                                                                                                                                 |
| Veneto                          | LR n.48/2012                              | Creation of fund supporting initiatives aimed at the reuse of assets for social goal; reduction of credit uncertainty following confiscation                                                                                                                                                                               |

**Table A2.** Results of Fixed Effect Panel Regression predicting Founding Rates in Italian Provinces  
(Excluding Mafia Intensive ATECO sectors)

|                                                                      | coef       | Se         |
|----------------------------------------------------------------------|------------|------------|
| Economic Assets Confiscation                                         | 6.25**     | (1.53)     |
| Operational Assets Confiscation                                      | -1.09**    | (0.36)     |
| Operational Assets Confiscation X Local Institutional Responsiveness | 0.42       | (0.28)     |
| Local Institutional Responsiveness                                   | 5.24       | (40.44)    |
| Innovation Intensity                                                 | -35.05**   | (11.17)    |
| Immigration Rate                                                     | -61.14     | (46.75)    |
| Unemployment                                                         | 8.90       | (7.30)     |
| Prosperity Rank                                                      | 1.47       | (0.87)     |
| Population Density                                                   | 11.99**    | (3.93)     |
| Business Density                                                     | 0.07**     | (0.02)     |
| Intensity of Mafia Activity                                          | -4.47      | (8.30)     |
| Province fixed effects                                               |            | Y          |
| Year fixed effects                                                   |            | Y          |
| Constant                                                             | -3,531.41* | (1,715.53) |
| Observations                                                         |            | 412        |
| R-squared (within)                                                   |            | 0.28       |
| Number of provinces                                                  |            | 103        |

Robust standard errors in parentheses

\*\* p < 0.01, \* p < 0.05

We identified sectors that are more prone to mafia infiltration based on expert assessment (Transcrime 2015). The industries at risk of organized crime infiltration can be identified as follows: Retail, Renewable Energies, Waste Disposal, Construction, and Hospitality (Restaurants and Hotels). The related ATECO codes are B, E, F, and I.
